# Supplementary material
Source: publisher figshare collection journal article supplement (https://acs.figshare.com/ndownloader/files/13125752)
Supplement: Supplementary file 1 [file 13125752]

## Supporting Information

# Self-reporting Colorimetric Analysis of Drug Release by Molecular Imprinted Structural Color Contact Lens

Jingzhe Deng,<sup>1,2</sup> Shan Chen,<sup>2</sup> Jialun Chen,<sup>2</sup> Hailong Ding,<sup>2</sup> Dawei Deng,<sup>1,\*</sup>

Zhuoying Xie<sup>2,\*</sup>

<sup>1</sup>Department of Biomedical Engineering, China Pharmaceutical University, Nanjing

211198, China

<sup>2</sup>State Key Laboratory of Bioelectronics, Southeast University, Nanjing 210096,

China

\* Corresponding author: [dengdawei@cpu.edu.cn](mailto:dengdawei@cpu.edu.cn)

\* Corresponding author: [zyxie@seu.edu.cn](mailto:zyxie@seu.edu.cn)

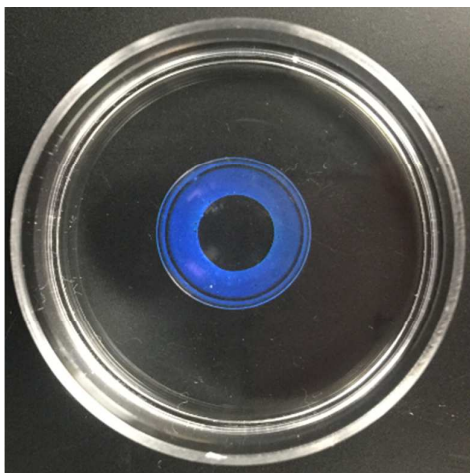

**Figure S1.** Digital photograph of structural color contact lens.

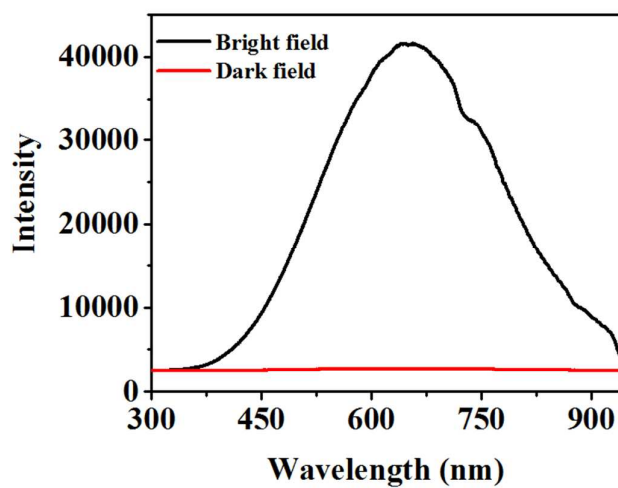

**Figure S2.** The bright field and the dark field of the fiber optic spectrometer.

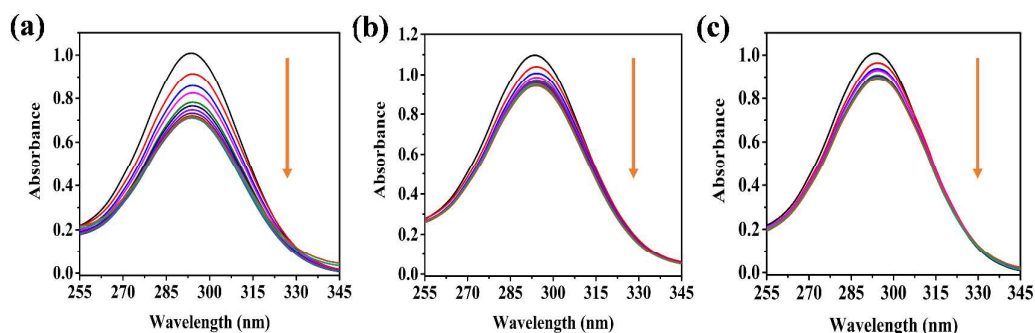

**Figure S3.** The change of absorbance of a) pH 6.5 and b) pH 5.5 loading solution for imprinted lens. c) The change of absorbance of pH 6.5 loading solution for non-imprinted lens. Both lenses were monitored from 0h to 12h and once every hour.

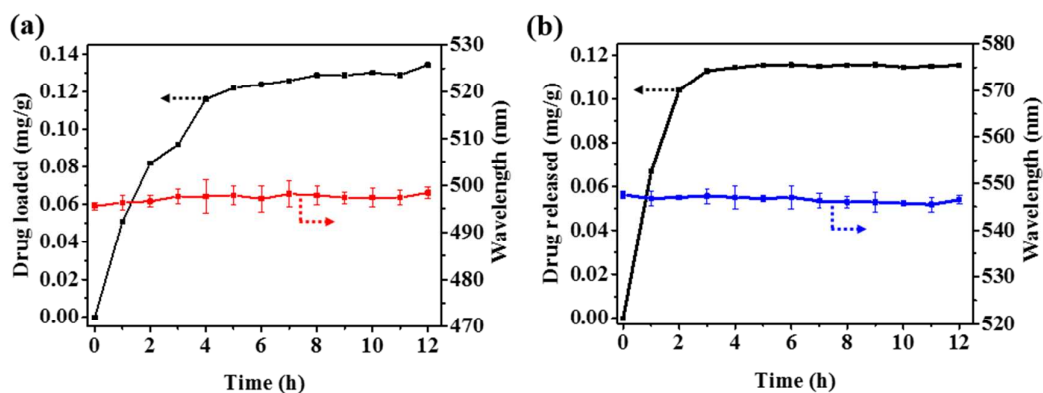

**Figure S4.** a) The accumulative loading and the reflection peak during non-imprinted lens loading in pH6.5 solution. b) The accumulative release and the reflection peak during non-imprinted lens releasing in artificial tear fluid. The error bars represent the standard deviations of measurements carried out in triplicate.

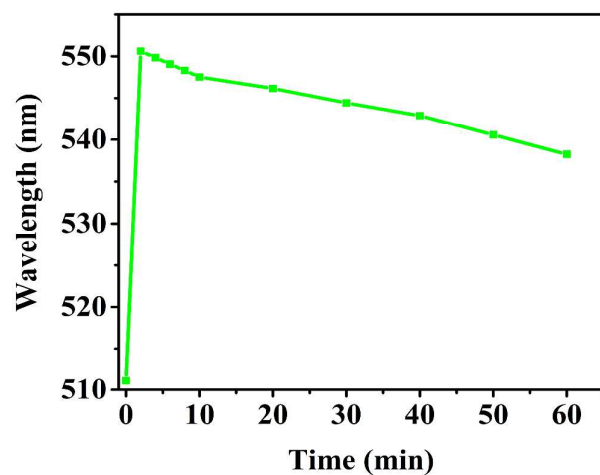

**Figure S5.** High-frequency monitoring of the reflection peak of the lens within the first hour of the lens immersed in artificial tear fluid.
